# Supplementary material for: Assignment of Reference 5’-end 16S rDNA Sequences and Species-Specific Sequence Polymorphisms Improves Species Identification of Nocardia
Source: PubMed Central journal article supplement — Open Microbiol J. 2009 Jun 23;3:97–105. doi: 10.2174/1874285800903010097 (PMC2714554; doi:10.2174/1874285800903010097), 2009-06-23
Supplement: TOMICROJ-3-97_SD1.pdf [file TOMICROJ-3-97_SD1.pdf]

SUPPLEMENTARY MATERIAL

Table S1. Identification of *Nocardia* spp. by phenotypic methods and 16S rDNA sequencing based on alignment with reference sequences and by BLASTn was provided as Supplementary Material on *The Open Microbiology Journal* Web site.

**Table S1. Identification of *Nocardia* spp. by Phenotypic Methods and 16S rDNA Sequencing Based on Alignment with Reference Sequences and by BLASTn**

| Strain ID                 | Phenotypic Identification                 | Identification by Alignment with Reference Sequence <sup>1</sup> | Identification by BLASTn Alignment            | GenBank % Similarity/no. Matched Sequences <sup>2</sup> | BIBI % Similarity/no. Matched Sequences <sup>2</sup> | RDP-II % Similarity/no. Matched Sequences <sup>2</sup> |
|---------------------------|-------------------------------------------|------------------------------------------------------------------|-----------------------------------------------|---------------------------------------------------------|------------------------------------------------------|--------------------------------------------------------|
| ATCC strains              |                                           |                                                                  |                                               |                                                         |                                                      |                                                        |
| ATCC 19247 <sup>T</sup>   | <i>Nocardia asteroides</i>                | <i>N. asteroides</i>                                             | <i>N. asteroides</i>                          | 100/3                                                   | 100/3                                                | 100/2                                                  |
| ATCC 3308                 | <i>Nocardia farcinica</i>                 | <i>N. farcinica</i>                                              | <i>N. farcinica</i>                           | 100/13                                                  | 100/11                                               | 100/7                                                  |
|                           |                                           |                                                                  | <i>Nocardia otitidiscaviarum</i> <sup>3</sup> | 100/1                                                   | 100/1                                                | 100/1                                                  |
| ATCC 3318 <sup>T</sup>    | <i>N. farcinica</i>                       | <i>N. farcinica</i>                                              | <i>N. farcinica</i>                           | 100/13                                                  | 100/11                                               | 100/7                                                  |
|                           |                                           |                                                                  | <i>N. otitidiscaviarum</i> <sup>3</sup>       | 100/1                                                   | 100/1                                                | 100/1                                                  |
| ATCC 33726 <sup>T</sup>   | <i>Nocardia nova</i>                      | <i>N. nova</i>                                                   | <i>N. nova</i>                                | 100/5                                                   | 100/5                                                | 100/4                                                  |
| ATCC 14629 <sup>T</sup>   | <i>N. otitidiscaviarum</i>                | <i>N. otitidiscaviarum</i>                                       | <i>N. otitidiscaviarum</i>                    | 100/5                                                   | 100/5                                                | 100/4                                                  |
| ATCC BAA-278 <sup>T</sup> | <i>Nocardia paucivorans</i>               | <i>N. paucivorans</i>                                            | <i>N. paucivorans</i>                         | 100/1                                                   | 100/1                                                | 100/1                                                  |
| Clinical isolates         |                                           |                                                                  |                                               |                                                         |                                                      |                                                        |
| 00-061-3088               | <i>N. asteroides</i>                      | <i>Nocardia beijingensis</i>                                     | <i>N. beijingensis</i>                        | 100/13                                                  | 100/18                                               | 98.1/13                                                |
| 00-159-1584               | <i>N. asteroides</i>                      | <i>Nocardia cyriacigeorgica</i>                                  | <i>N. cyriacigeorgica</i>                     | 99.8/35                                                 | 99.8/21                                              | 99.1/15                                                |
| 00-236-1204               | <i>N. asteroides</i>                      | <i>N. cyriacigeorgica</i>                                        | <i>N. cyriacigeorgica</i>                     | 100/35                                                  | 100/21                                               | 100/15                                                 |
| 00-279-0751               | <i>N. asteroides</i> complex <sup>4</sup> | <i>N. cyriacigeorgica</i>                                        | <i>N. cyriacigeorgica</i>                     | 100/35                                                  | 100/21                                               | 100/15                                                 |
| 00-361-0960               | <i>N. asteroides</i>                      | <i>N. cyriacigeorgica</i>                                        | <i>N. cyriacigeorgica</i>                     | 100/35                                                  | 100/21                                               | 100/15                                                 |
| 01-066-1903               | <i>N. asteroides</i>                      | <i>N. nova</i>                                                   | <i>N. nova</i>                                | 99.7/4                                                  | 100/4                                                | 100/4                                                  |
| 01-226-3924               | <i>N. asteroides</i>                      | <i>N. cyriacigeorgica</i>                                        | <i>N. cyriacigeorgica</i>                     | 100/35                                                  | 100/21                                               | 100/15                                                 |
| 01-317-3331               | <i>N. asteroides</i>                      | <i>N. cyriacigeorgica</i>                                        | <i>N. cyriacigeorgica</i>                     | 100/35                                                  | 100/21                                               | 100/15                                                 |
| 01-320-2714               | <i>N. asteroides</i>                      | <i>Nocardia arthritis</i> <sup>5</sup>                           | <i>N. beijingensis</i> <sup>6</sup>           | 99.6/1                                                  | 99.6/1                                               | 97.61                                                  |
| 02-071-3627               | <i>N. asteroides</i>                      | <i>N. asteroides</i> Type I                                      | <i>N. asteroides</i>                          | 99.0/3                                                  | 100/3                                                | 100/2                                                  |
| 02-150-3195               | <i>N. asteroides</i>                      | <i>N. cyriacigeorgica</i>                                        | <i>N. cyriacigeorgica</i>                     | 100/35                                                  | 100/21                                               | 100/15                                                 |
| 02-347-2673               | <i>N. asteroides</i> complex <sup>4</sup> | <i>Nocardia abscessus</i>                                        | <i>N. asteroides</i>                          | 100/1                                                   | 100/2                                                |                                                        |
|                           |                                           |                                                                  | <i>N. abscessus</i>                           | 100/6                                                   | 100/6                                                | 100/5                                                  |
|                           |                                           |                                                                  | <i>Nocardia asiatica</i>                      | 100/8                                                   | 100/12                                               | 100/8                                                  |
| 03-044-3083               | <i>N. asteroides</i>                      | <i>N. cyriacigeorgica</i>                                        | <i>N. cyriacigeorgica</i>                     | 100/35                                                  | 100/21                                               | 100/15                                                 |
| 03-065-1348               | <i>N. asteroides</i>                      | <i>N. cyriacigeorgica</i>                                        | <i>N. cyriacigeorgica</i>                     | 100/35                                                  | 100/21                                               | 100/15                                                 |
| 03-072-1482               | <i>N. asteroides</i>                      | <i>N. cyriacigeorgica</i>                                        | <i>N. cyriacigeorgica</i>                     | 100/35                                                  | 100/21                                               | 100/15                                                 |
| 03-078-3387               | <i>N. asteroides</i>                      | <i>N. cyriacigeorgica</i>                                        | <i>N. cyriacigeorgica</i>                     | 100/35                                                  | 100/21                                               | 100/15                                                 |
| 03-090-3765               | <i>N. asteroides</i>                      | <i>N. cyriacigeorgica</i>                                        | <i>N. cyriacigeorgica</i>                     | 100/35                                                  | 100/21                                               | 100/15                                                 |
| 03-125-3479               | <i>N. asteroides</i>                      | <i>N. cyriacigeorgica</i>                                        | <i>N. cyriacigeorgica</i>                     | 100/35                                                  | 100/21                                               | 100/15                                                 |
| 03-141-3073               | <i>N. asteroides</i> complex <sup>4</sup> | <i>N. paucivorans</i>                                            | <i>N. paucivorans</i>                         | 100/1                                                   | 100/1                                                | 100/1                                                  |

Table S1. contd....

| Strain ID         | Phenotypic Identification                 | Identification by Alignment with Reference Sequence <sup>1</sup> | Identification by BLASTn Alignment                               | GenBank % Similarity/no. Matched Sequences <sup>2</sup> | BIBI % Similarity/no. Matched Sequences <sup>2</sup> | RDP-II % Similarity/no. Matched Sequences <sup>2</sup> |
|-------------------|-------------------------------------------|------------------------------------------------------------------|------------------------------------------------------------------|---------------------------------------------------------|------------------------------------------------------|--------------------------------------------------------|
| Clinical isolates |                                           |                                                                  |                                                                  |                                                         |                                                      |                                                        |
| 03-185-3304       | <i>N. asteroides</i>                      | <i>N. paucivorans</i>                                            | <i>N. paucivorans</i>                                            | 100/1                                                   | 100/1                                                | 100/1                                                  |
| 03-240-2758       | <i>N. asteroides</i> complex <sup>4</sup> | <i>N. paucivorans</i>                                            | <i>N. paucivorans</i>                                            | 100/1                                                   | 100/1                                                | 100/1                                                  |
| 03-246-1321       | <i>N. asteroides</i> complex <sup>4</sup> | <i>N. cyriacigeorgica</i>                                        | <i>N. cyriacigeorgica</i>                                        | 100/35                                                  | 100/21                                               | 100/15                                                 |
| 03-294-3356       | <i>N. asteroides</i>                      | <i>N. beijingensis</i>                                           | <i>N. beijingensis</i>                                           | 100/13                                                  | 100/18                                               | 98.1/13                                                |
| 03-342-3119       | <i>N. asteroides</i>                      | <i>N. cyriacigeorgica</i>                                        | <i>N. cyriacigeorgica</i>                                        | 100/35                                                  | 100/21                                               | 100/15                                                 |
| 04-128-3054       | <i>N. asteroides</i>                      | <i>N. nova</i>                                                   | <i>N. nova</i>                                                   | 100/5                                                   | 100/5                                                | 100/4                                                  |
| 04-141-1037       | <i>N. asteroides</i> complex <sup>4</sup> | <i>N. farcinica</i>                                              | <i>N. farcinica</i> /<br><i>N. otitidiscaviarum</i> <sup>3</sup> | 100/13                                                  | 100/11                                               | 100/7                                                  |
| 04-167-1813       | <i>N. asteroides</i>                      | <i>N. cyriacigeorgica</i>                                        | <i>N. cyriacigeorgica</i>                                        | 100/35                                                  | 100/21                                               | 100/15                                                 |
| 04-181-3939       | <i>N. asteroides</i>                      | <i>N. cyriacigeorgica</i>                                        | <i>N. cyriacigeorgica</i>                                        | 99.8/35                                                 | 99.8/21                                              | 99.1/15                                                |
| 04-204-3567       | <i>N. asteroides</i>                      | <i>Nocardia veterana</i>                                         | <i>N. veteran</i>                                                | 100/5                                                   | 100/8                                                | 100/4                                                  |
| 05-034-0715       | <i>N. asteroides</i> complex <sup>4</sup> | <i>N. cyriacigeorgica</i>                                        | <i>N. cyriacigeorgica</i>                                        | 100/35                                                  | 100/21                                               | 100/15                                                 |
| 05-040-4253       | <i>N. asteroides</i> complex <sup>4</sup> | <i>N. cyriacigeorgica</i>                                        | <i>N. cyriacigeorgica</i>                                        | 100/35                                                  | 100/21                                               | 100/15                                                 |
| 05-062-1428       | <i>N. asteroides</i> complex <sup>4</sup> | <i>N. cyriacigeorgica</i>                                        | <i>N. cyriacigeorgica</i>                                        | 100/35                                                  | 100/21                                               | 100/15                                                 |
| 05-073-0700       | <i>N. asteroides</i> complex <sup>4</sup> | <i>N. cyriacigeorgica</i>                                        | <i>N. cyriacigeorgica</i>                                        | 100/35                                                  | 100/21                                               | 100/15                                                 |
| 05-111-2308       | <i>N. asteroides</i> complex <sup>4</sup> | <i>N. cyriacigeorgica</i>                                        | <i>N. cyriacigeorgica</i>                                        | 99.8/35                                                 | 99.8/21                                              | 99.1/15                                                |
| 99-167-2395       | <i>Nocardia brasiliensis</i>              | <i>N. brasiliensis</i>                                           | <i>N. brasiliensis</i>                                           | 100/1                                                   | 100/1                                                | 100/1                                                  |
| 00-194-3516       | <i>N. brasiliensis</i>                    | <i>N. brasiliensis</i>                                           | <i>N. brasiliensis</i>                                           | 100/2                                                   | 100/4                                                | 100/2                                                  |
| 01-114-2816       | <i>N. brasiliensis</i>                    | <i>N. otitidiscaviarum</i>                                       | <i>N. otitidiscaviarum</i>                                       | 100/1                                                   | 100/1                                                | 100/1                                                  |
| 03-273-2825       | <i>N. brasiliensis</i>                    | <i>N. brasiliensis</i>                                           | <i>N. brasiliensis</i>                                           | 100/1                                                   | 100/1                                                | 100/1                                                  |
| QAP00-122         | <i>N. farcinica</i>                       | <i>N. farcinica</i>                                              | <i>N. farcinica</i> /<br><i>N. otitidiscaviarum</i> <sup>3</sup> | 100/13                                                  | 100/11                                               | 100/7                                                  |
| 99-291-2642       | <i>N. farcinica</i>                       | <i>N. farcinica</i>                                              | <i>N. farcinica</i> /<br><i>N. otitidiscaviarum</i> <sup>3</sup> | 100/13                                                  | 100/11                                               | 100/7                                                  |
| 00-122-3261       | <i>N. farcinica</i>                       | <i>N. farcinica</i>                                              | <i>N. farcinica</i> /<br><i>N. otitidiscaviarum</i> <sup>3</sup> | 100/13                                                  | 100/11                                               | 100/7                                                  |
| 01-109-2248       | <i>N. farcinica</i>                       | <i>N. farcinica</i>                                              | <i>N. farcinica</i> /<br><i>N. otitidiscaviarum</i> <sup>3</sup> | 100/13                                                  | 100/11                                               | 100/7                                                  |
| 03-072-2892       | <i>N. farcinica</i>                       | <i>N. cyriacigeorgica</i>                                        | <i>N. cyriacigeorgica</i>                                        | 100/35                                                  | 100/21                                               | 100/15                                                 |
| 03-177-3035       | <i>N. farcinica</i>                       | <i>N. farcinica</i>                                              | <i>N. farcinica</i> /<br><i>N. otitidiscaviarum</i> <sup>3</sup> | 100/13                                                  | 100/11                                               | 100/7                                                  |
| 03-225-1079       | <i>N. farcinica</i>                       | <i>N. cyriacigeorgica</i>                                        | <i>N. cyriacigeorgica</i>                                        | 100/35                                                  | 100/21                                               | 100/15                                                 |
| 05-048-3600       | <i>N. farcinica</i>                       | <i>N. farcinica</i>                                              | <i>N. farcinica</i> /<br><i>N. otitidiscaviarum</i> <sup>3</sup> | 100/13                                                  | 100/11                                               | 100/7                                                  |
| 05-186-4091       | <i>N. farcinica</i>                       | <i>N. farcinica</i>                                              | <i>N. farcinica</i> /<br><i>N. otitidiscaviarum</i> <sup>3</sup> | 100/13                                                  | 100/11                                               | 100/7                                                  |
| 05-207-0815       | <i>N. farcinica</i>                       | <i>N. farcinica</i>                                              | <i>N. farcinica</i> /<br><i>N. otitidiscaviarum</i> <sup>3</sup> | 100/13                                                  | 100/11                                               | 100/7                                                  |

Table S1. contd....

| Strain ID   | Phenotypic Identification  | Identification by Alignment with Reference Sequence <sup>1</sup> | Identification by BLASTn Alignment      | GenBank % Similarity/no. Matched Sequences <sup>2</sup> | BIBI % Similarity/no. Matched Sequences <sup>2</sup> | RDP-II % Similarity/no. Matched Sequences <sup>2</sup> |
|-------------|----------------------------|------------------------------------------------------------------|-----------------------------------------|---------------------------------------------------------|------------------------------------------------------|--------------------------------------------------------|
| 98-286-1121 | <i>Nocardia nova</i>       | <i>N. nova</i>                                                   | <i>N. nova</i>                          | 100/4                                                   | 100/4                                                | 100/4                                                  |
| 99-270-2693 | <i>N. nova</i>             | <i>N. nova</i>                                                   | <i>N. nova</i>                          | 100/5                                                   | 100/5                                                | 100/4                                                  |
| 00-025-0538 | <i>N. nova</i>             | <i>N. nova</i>                                                   | <i>N. nova</i>                          | 99.8/2                                                  | 99.8/2                                               | 99.0/2                                                 |
| 00-056-3529 | <i>N. nova</i>             | <i>N. nova</i>                                                   | <i>N. nova</i>                          | 100/4                                                   | 100/4                                                | 100/4                                                  |
| 00-130-2170 | <i>N. nova</i>             | <i>N. nova</i>                                                   | <i>N. nova</i>                          | 99.8/5                                                  | 99.8/6                                               | 100/4                                                  |
| 00-314-1789 | <i>N. nova</i>             | <i>N. nova</i>                                                   | <i>N. nova</i>                          | 99.8/2                                                  | 99.8/2                                               | 99.0/2                                                 |
| 00-328-2545 | <i>N. nova</i>             | <i>N. veterana</i>                                               | <i>N. veterana</i>                      | 100/5                                                   | 100/8                                                | 100/4                                                  |
| 01-067-1349 | <i>N. nova</i>             | <i>N. nova</i>                                                   | <i>N. nova</i>                          | 100/4                                                   | 100/4                                                | 100/4                                                  |
| 01-097-0996 | <i>N. nova</i>             | <i>N. nova</i>                                                   | <i>N. nova</i>                          | 100/4                                                   | 100/4                                                | 100/4                                                  |
| 01-290-2233 | <i>N. nova</i>             | <i>N. nova</i>                                                   | <i>N. nova</i>                          | 100/5                                                   | 100/5                                                | 100/4                                                  |
| 02-021-0419 | <i>N. nova</i>             | <i>N. nova</i>                                                   | <i>N. nova</i>                          | 99.8/2                                                  | 99.8/2                                               | 99.0/2                                                 |
| 02-190-3153 | <i>N. nova</i>             | <i>N. nova</i>                                                   | <i>N. nova</i>                          | 100/5                                                   | 100/5                                                | 100/4                                                  |
| 02-199-2723 | <i>N. nova</i>             | <i>N. nova</i>                                                   | <i>N. nova</i>                          | 100/4                                                   | 100/4                                                | 100/4                                                  |
| 02-338-3117 | <i>N. nova</i>             | <i>N. nova</i>                                                   | <i>N. nova</i>                          | 100/5                                                   | 100/5                                                | 100/4                                                  |
| 02-352-3316 | <i>N. nova</i>             | <i>N. nova</i>                                                   | <i>N. nova</i>                          | 99.8/5                                                  | 99.8/6                                               | 100/4                                                  |
| 03-023-2333 | <i>N. nova</i>             | <i>N. nova</i>                                                   | <i>N. nova</i>                          | 99.7/5                                                  | 99.6/6                                               | 100/4                                                  |
| 03-148-3019 | <i>N. nova</i>             | <i>N. nova</i>                                                   | <i>N. nova</i>                          | 99.7/5                                                  | 99.6/6                                               | 100/4                                                  |
| 03-148-3335 | <i>N. nova</i>             | <i>N. nova</i>                                                   | <i>N. nova</i>                          | 99.7/5                                                  | 99.6/6                                               | 100/4                                                  |
| 03-191-3673 | <i>N. nova</i>             | <i>N. nova</i>                                                   | <i>N. nova</i>                          | 99.7/5                                                  | 99.6/6                                               | 100/4                                                  |
| 03-193-1476 | <i>N. nova</i>             | <i>N. nova</i>                                                   | <i>N. nova</i>                          | 99.7/5                                                  | 99.6/6                                               | 100/4                                                  |
| 03-209-3294 | <i>N. nova</i>             | <i>N. nova</i>                                                   | <i>N. nova</i>                          | 100/5                                                   | 100/5                                                | 100/4                                                  |
| 03-311-3419 | <i>N. nova</i>             | <i>N. nova</i>                                                   | <i>N. nova</i>                          | 100/5                                                   | 100/5                                                | 100/4                                                  |
| 04-110-3287 | <i>N. nova</i>             | <i>N. nova</i>                                                   | <i>N. nova</i>                          | 99.7/9                                                  | 99.6/11                                              | 100/8                                                  |
| 04-147-3176 | <i>N. nova</i>             | <i>N. nova</i>                                                   | <i>N. nova</i>                          | 100/5                                                   | 100/5                                                | 100/4                                                  |
| 04-150-0614 | <i>N. nova</i>             | <i>N. nova</i>                                                   | <i>N. nova</i>                          | 99.8/2                                                  | 99.8/2                                               | 99.0/2                                                 |
| 04-304-1735 | <i>N. nova</i>             | <i>N. nova</i>                                                   | <i>N. nova</i>                          | 100/5                                                   | 100/5                                                | 100/4                                                  |
| 05-053-4454 | <i>N. nova</i>             | <i>N. nova</i>                                                   | <i>N. nova</i>                          | 99.3/4                                                  | 99.6/4                                               | 99.3/4                                                 |
| 05-141-1366 | <i>N. nova</i>             | <i>N. nova</i>                                                   | <i>N. nova</i>                          | 100/5                                                   | 100/5                                                | 100/4                                                  |
| 00-188-1453 | <i>N. otitidiscaviarum</i> | <i>N. otitidiscaviarum</i>                                       | <i>N. otitidiscaviarum</i>              | 100/5                                                   | 100/5                                                | 100/4                                                  |
| 01-257-1336 | <i>N. otitidiscaviarum</i> | <i>N. otitidiscaviarum</i>                                       | <i>N. otitidiscaviarum</i>              | 100/5                                                   | 100/5                                                | 100/4                                                  |
| 04-009-0080 | <i>N. otitidiscaviarum</i> | <i>N. otitidiscaviarum</i>                                       | <i>N. otitidiscaviarum</i>              | 100/5                                                   | 100/5                                                | 100/4                                                  |
| 97-114-0609 | <i>Nocardia</i> spp.       | <i>N. paucivorans</i>                                            | <i>N. paucivorans</i>                   | 100/1                                                   | 100/1                                                | 100/1                                                  |
| 97-16298    | <i>Nocardia</i> spp.       | <i>N. paucivorans</i>                                            | <i>N. paucivorans</i>                   | 100/1                                                   | 100/1                                                | 100/1                                                  |
| 99-146-2360 | <i>Nocardia</i> spp.       | <i>N. vinacea</i>                                                | <i>N. vinacea</i>                       | 100/3                                                   | 100/3                                                | 100/2                                                  |
| 02-317-3646 | <i>Nocardia</i> spp.       | <i>N. nova</i>                                                   | <i>N. nova</i>                          | 100/5                                                   | 100/5                                                | 100/4                                                  |
| 03-310-2776 | <i>Nocardia</i> spp.       | <i>N. transvalensis</i>                                          | <i>N. transvalensis</i>                 | 99.7/3                                                  | 99.6/5                                               | 98.8/2                                                 |
| 03-342-3449 | <i>Nocardia</i> spp.       | <i>N. farcinica</i>                                              | <i>N. farcinica</i>                     | 100/13                                                  | 100/11                                               | 100/7                                                  |
|             |                            |                                                                  | <i>N. otitidiscaviarum</i> <sup>3</sup> | 100/1                                                   | 100/1                                                | 100/1                                                  |

Table S1. contd....

| Strain ID   | Phenotypic Identification | Identification by Alignment with Reference Sequence <sup>1</sup> | Identification by BLASTn Alignment      | GenBank % Similarity/no. Matched Sequences <sup>2</sup> | BIBI % Similarity/no. Matched Sequences <sup>2</sup> | RDP-II % Similarity/no. Matched Sequences <sup>2</sup> |
|-------------|---------------------------|------------------------------------------------------------------|-----------------------------------------|---------------------------------------------------------|------------------------------------------------------|--------------------------------------------------------|
| 04-241-1298 | <i>Nocardia</i> spp.      | <i>N. veterana</i>                                               | <i>N. veteran</i>                       | 100/5                                                   | 100/8                                                | 100/4                                                  |
| 04-303-0576 | <i>Nocardia</i> spp.      | <i>Nocardia aobensis</i>                                         | <i>N. aobensis</i>                      | 99.8/4                                                  | 99.8/4                                               | 98.8/4                                                 |
| 04-352-2154 | <i>Nocardia</i> spp.      | <i>N.veterana</i>                                                | <i>N. veteran</i>                       | 100/5                                                   | 100/8                                                | 100/4                                                  |
| 05-118-2483 | <i>Nocardia</i> spp.      | <i>N. farcinica</i>                                              | <i>N. farcinica/</i>                    | 100/13                                                  | 100/11                                               | 100/7                                                  |
|             |                           |                                                                  | <i>N. otitidiscaviarum</i> <sup>3</sup> | 100/1                                                   | 100/1                                                | 100/1                                                  |
| 05-200-1797 | <i>Nocardia</i> spp.      | <i>N. paucivorans</i>                                            | <i>N. paucivorans</i>                   | 100/1                                                   | 100/1                                                | 100/1                                                  |

<sup>1</sup>Identification achieved with 100% sequence similarity (identity) to reference sequence unless specified otherwise.

<sup>2</sup>Number of sequences in database with 100% sequence similarity to sequence of isolate.

<sup>3</sup>*N. otitidiscaviarum* strain DSM 43242<sup>T</sup> probably represents a misidentification.

<sup>4</sup>The former *N. atseroides* complex encompassed species now designated as *N. abscessus*, *N. asteroides*, *N. cyriacigeorgica*, *N. farcinica*, *N. nova* and *N. transvalensis* [2].

<sup>5</sup>99% sequence similarity to reference *N. arthriditis* sequence (strain DSM 447231<sup>T</sup>, GenBank accession no. AY903619).

<sup>6</sup>99.6% sequence similarity to a single *N. beijingensis* sequence (GenBank accession no. AY756543) but <99% similarity to multiple other *N. beijingensis*.

## REFERENCE

- Brown-Elliott BA, Brown JM, Conville PS, Wallace RJ, Jr. Clinical and laboratory features of the *Nocardia* spp. based on current molecular taxonomy. Clin Microbiol Rev 2006; 19: 259-282. Note:
